# Supplementary material for: Theoretical characterization of the conformational features of unnatural oligonucleotides containing a six nucleotide genetic alphabet
Source: Royal Society of Chemistry journal article supplement (doi:10.1039/c6cp05594j), 2016-01-01
Supplement: c6cp05594j1.pdf [file c6cp05594j1.pdf]

## Supplementary Information for:

# Theoretical Characterization of the Conformational Feature for Unnatural Oligonucleotide Containing a Six Nucleotide Genetic Alphabet

Wenjuan Wang,<sup>a</sup> Xiehuang Sheng,<sup>\*,a</sup> Shaolong Zhang,<sup>‡,a</sup> Fang Huang,<sup>a</sup> Chuanzhi Sun,<sup>a</sup> Jianbiao Liu,<sup>a</sup>  
Dezhan Chen<sup>\*,a</sup>

<sup>a</sup>College of Chemistry, Chemical Engineering and Materials Science, Collaborative Innovation Center of Functionalized Probes for Chemical Imaging in Universities of Shandong, Key Laboratory of Molecular and Nano Probes, Ministry of Education, Shandong Provincial Key Laboratory of Clean Production of Fine Chemicals, Shandong Normal University, Jinan 250014, P. R. China.

<sup>b</sup>College of Physics and Electronics, Shandong Normal University, Jinan 250014, P. R. China.

## Table of Contents

|                                                                                                                       |       |
|-----------------------------------------------------------------------------------------------------------------------|-------|
| ■ Fig. S1-S7                                                                                                          | 2-7   |
| ■ Table S1-S3                                                                                                         | 8-9   |
| ■ Cartesian Coordinates (Å) and Free Energies at 298.15 K and 1 atm<br>for the Gas/Solvent Phase Optimized Structures | 10-28 |

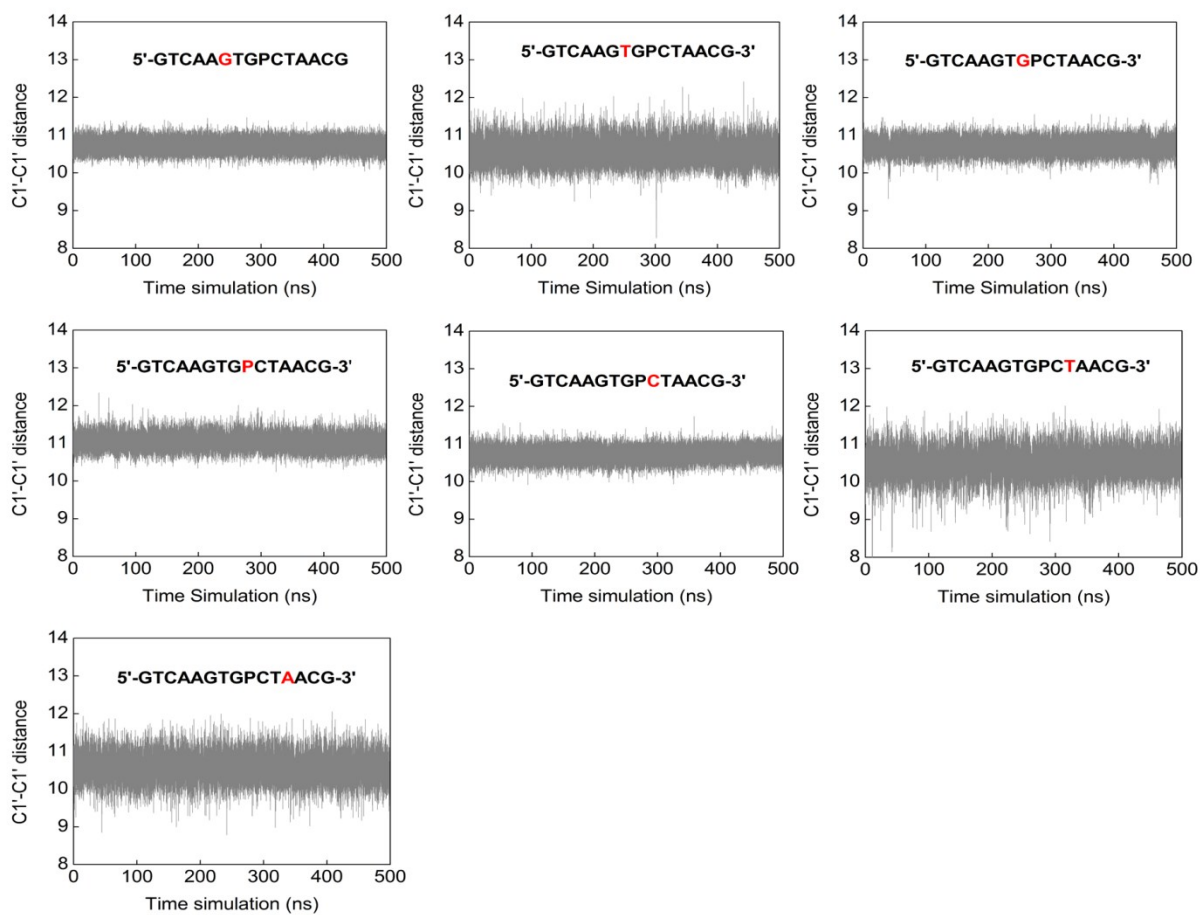

**Fig. S1** Time evolution of the C1'-C1' distances for natural and unnatural residues of the sequence 5'-GTCAAGTGPCTAACG-3'. (The highlighted letter in each of the Figure shows the respective position of the residue in the sequence.)

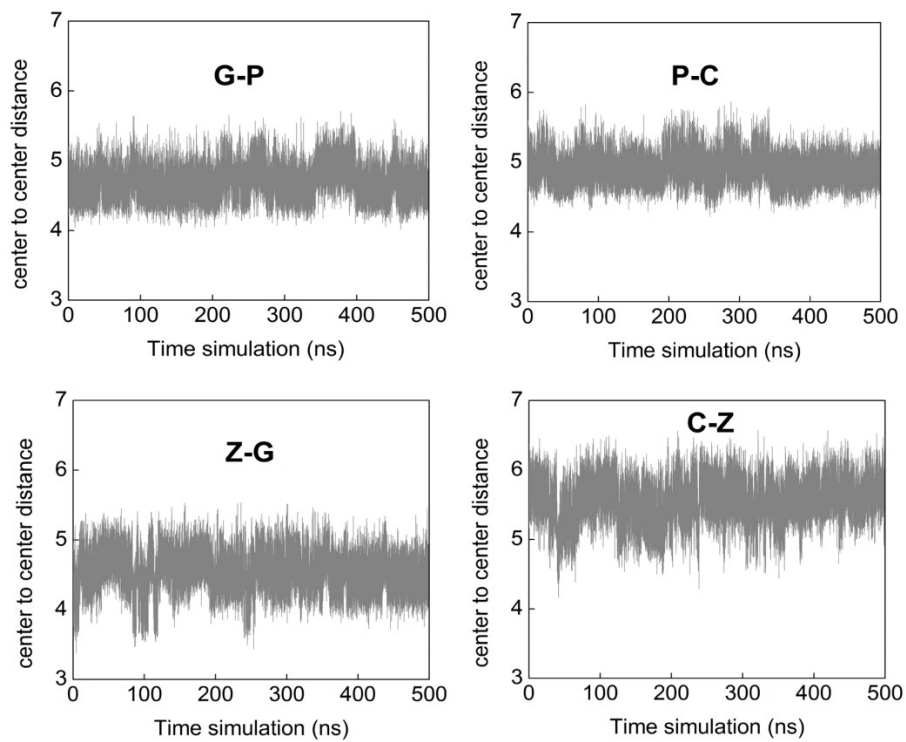

**Fig. S2** Time evolution of the center-to-center distances between unnatural base and their neighboring stacked natural bases. (a) G-P, (b) P-C, (c) C-Z, and (d) Z-G.

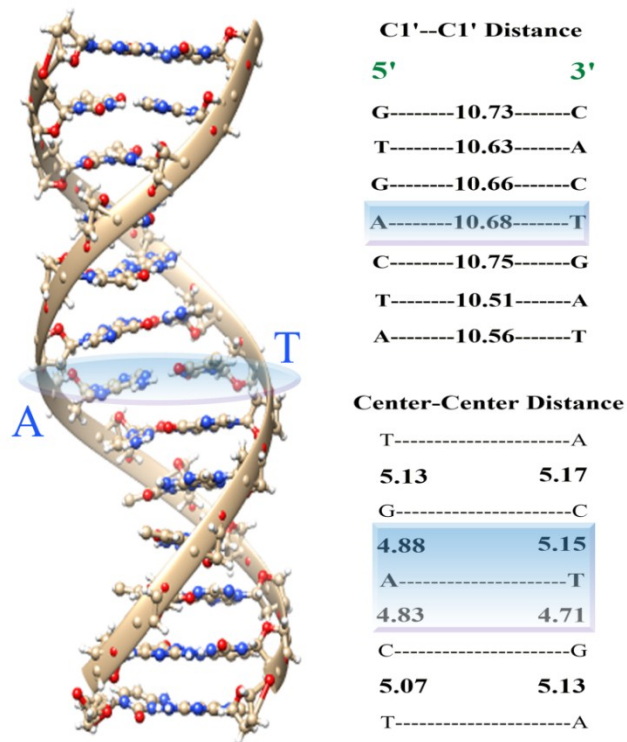

**Fig. S3** MD average conformation of natural oligonucleotides containing AT<sup>9th</sup> of the production run, along with the average C1'-C1' distances and the center-to-center distance of neighboring stacked natural bases.

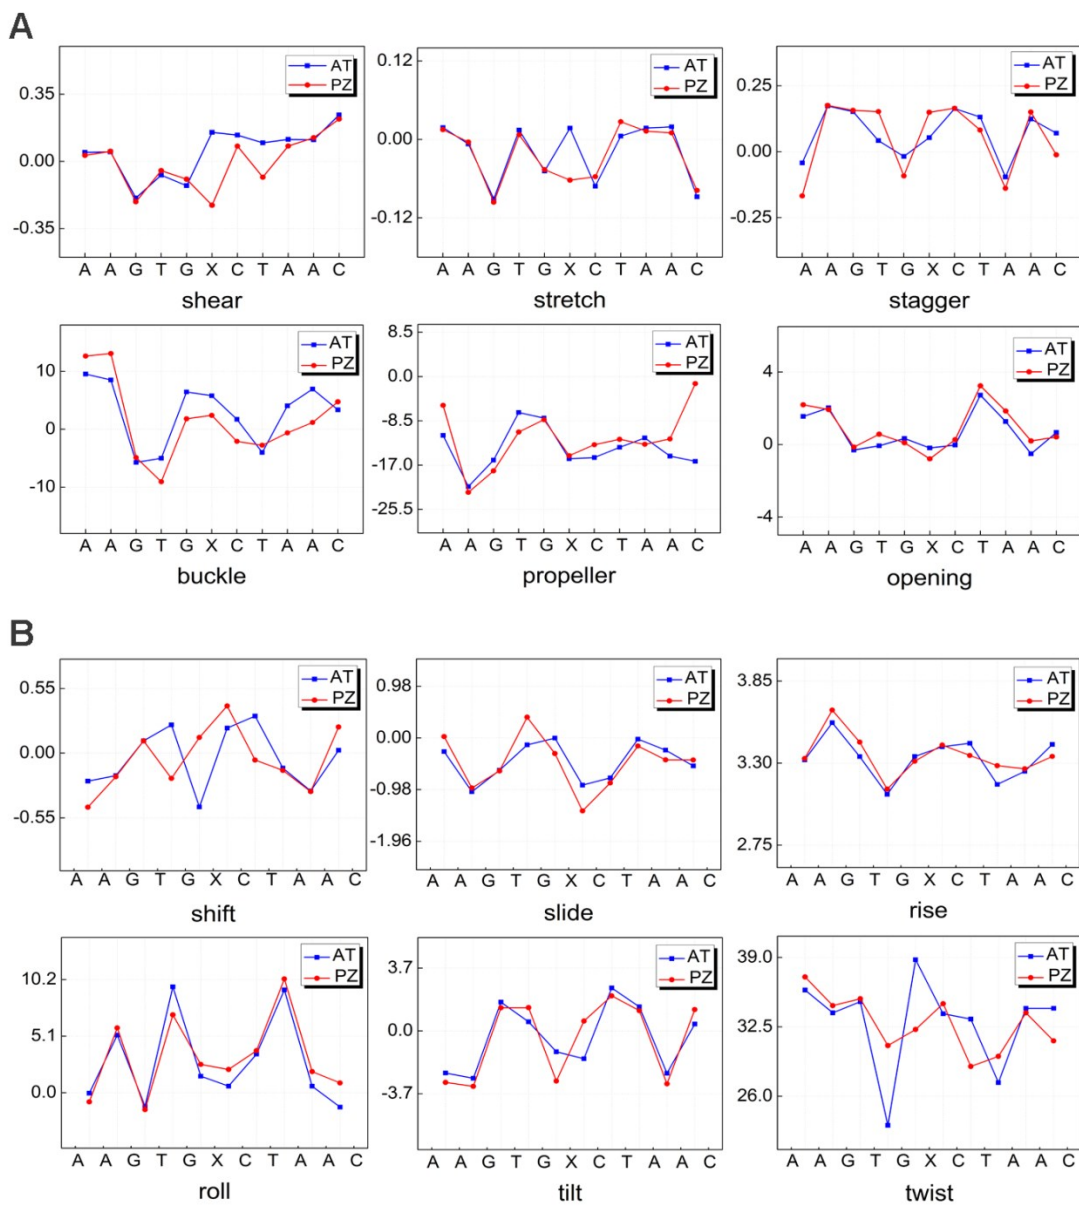

**Fig. S4** Average values of the intra-base-pair (A) and inter-base-pair parameters (B) from MD simulations of oligonucleotides containing PZ<sup>9th</sup> (red) and AT<sup>9th</sup> (blue).

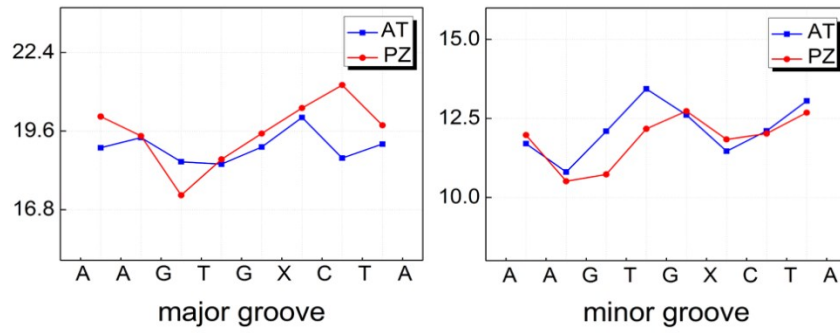

**Fig. S5** Average values of groove widths parameters from MD simulations of oligonucleotides containing PZ<sup>9th</sup> and AT<sup>9th</sup>.

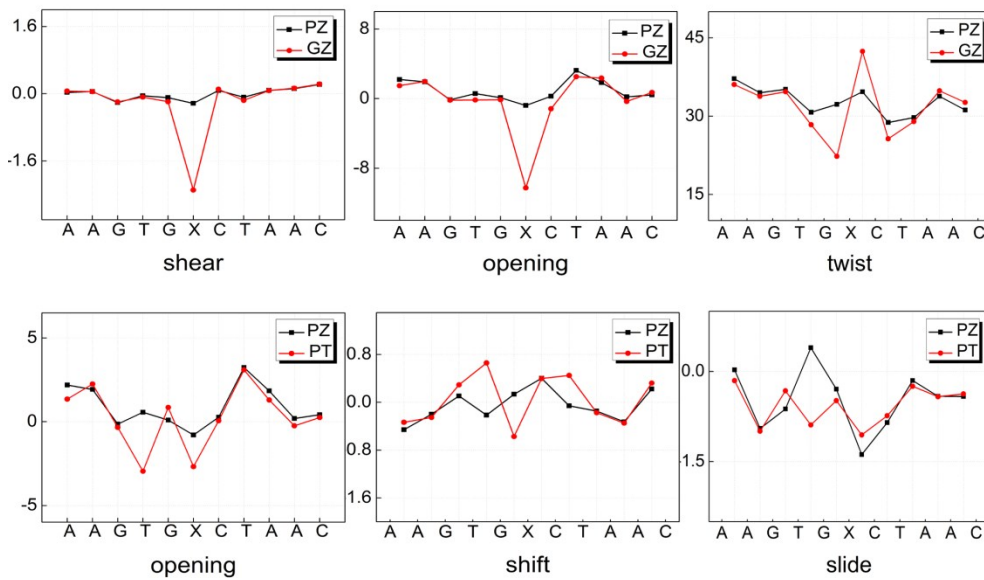

**Fig. S6** Average values of intra/inter-base-pair parameters for oligonucleotides containing PZ<sup>9th</sup> and mismatched PT<sup>9th</sup>/GZ<sup>9th</sup>, respectively.

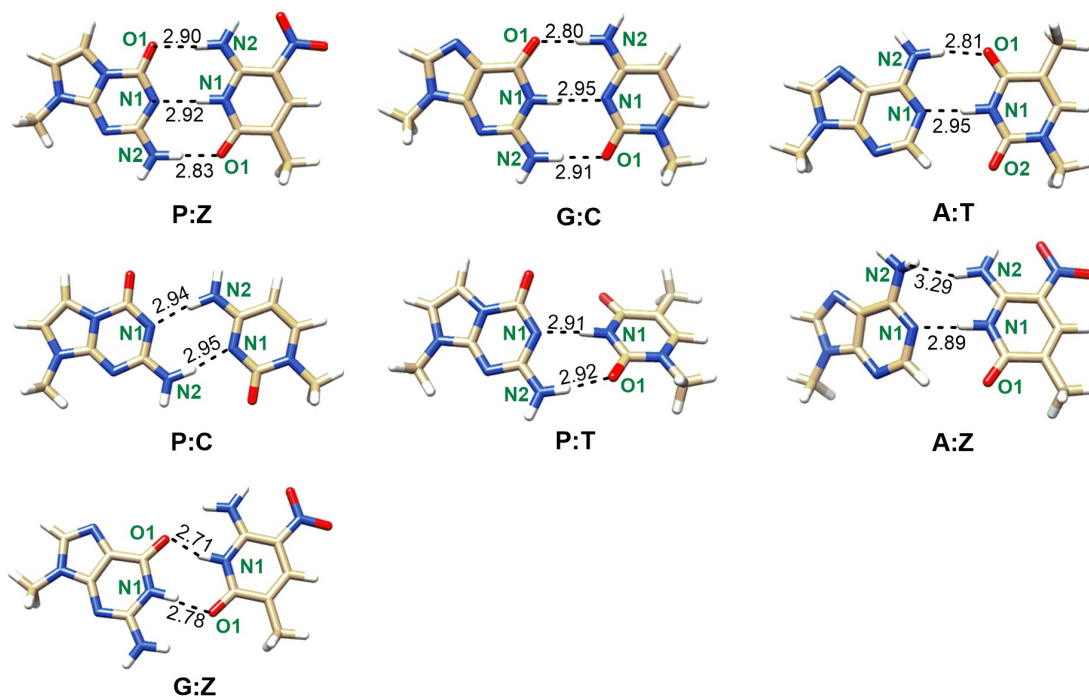

**Fig. S7** The optimal geometries for the seven modeled base pairs along with H-bonding distances (in Å) in gas.

**Table S1: Simulated sequences.**

| <i>DNA Sequence</i>                                | <i>X:Y pair</i> | <i>Position of the Modification</i> | <i>Duration(ns)</i> |
|----------------------------------------------------|-----------------|-------------------------------------|---------------------|
| 5'-GTCAAGTG-X-CTAACG-3'<br>3'-CAGTTCAC-Y-GATTGC-5' | PZ              | 9                                   | 1500                |
|                                                    | GC              | 9                                   | 1500                |
|                                                    | AT              | 9                                   | 1500                |
|                                                    | PC              | 9                                   | 500                 |
|                                                    | PT              | 9                                   | 500                 |
|                                                    | AZ              | 9                                   | 500                 |
|                                                    | GZ              | 9                                   | 500                 |

**Table S2: Energy values for gas phase interaction energy calculation of the base pairs optimized in M06-2X level.**

| <b>Base Pair</b> | $E_{AB}$<br>(Hartree/<br>Partical) | $E^0_A$<br>(Hartree/<br>Partical) | $E^0_B$<br>(Hartree/<br>Partical) | $\Delta E_{\text{gas}}$<br>(kcal/mol) | $E_{\text{BSSE}}$<br>(kcal/mol) | $E_{\text{gas.int}}$<br>(kcal/mol) |
|------------------|------------------------------------|-----------------------------------|-----------------------------------|---------------------------------------|---------------------------------|------------------------------------|
| <b>AT</b>        | -997.461                           | -505.278                          | -492.154                          | -18.077                               | 3.897                           | -14.179                            |
| <b>GC</b>        | -1013.500                          | -580.359                          | -433.093                          | -30.531                               | 4.591                           | -25.940                            |
| <b>PZ</b>        | -1201.550                          | -580.353                          | -621.148                          | -31.049                               | 4.819                           | -26.231                            |
| <b>PC</b>        | -1013.480                          | -580.353                          | -433.093                          | -21.679                               | 3.778                           | -17.901                            |
| <b>PT</b>        | -1072.532                          | -580.353                          | -492.154                          | -15.457                               | 3.732                           | -11.725                            |
| <b>AZ</b>        | -1126.452                          | -505.278                          | -621.148                          | -16.540                               | 3.952                           | -12.588                            |
| <b>GZ</b>        | -1201.554                          | -580.359                          | -621.148                          | -29.960                               | 4.596                           | -25.363                            |



**Table S3: Energy values for solvent phase interaction energy calculation of the base pairs optimized in M06-2X level.**

| <b>Base Pair</b> | $E_{AB}$<br>(Hartree/<br>Partical) | $E^0_A$<br>(Hartree/<br>Partical) | $E^0_B$<br>(Hartree/<br>Partical) | $\Delta E_{sol}$<br>(kcal/mol) | $E_{BSSE}$<br>(kcal/mol) | $E^{sol}_{int}$<br>(kcal/mol) |
|------------------|------------------------------------|-----------------------------------|-----------------------------------|--------------------------------|--------------------------|-------------------------------|
| <b>AT</b>        | -997.481                           | -505.291                          | -492.168                          | -13.295                        | 3.897                    | -9.398                        |
| <b>GC</b>        | -1013.527                          | -580.383                          | -433.113                          | -19.331                        | 4.591                    | -14.740                       |
| <b>PZ</b>        | -1201.572                          | -580.374                          | -621.166                          | -20.199                        | 4.819                    | -15.380                       |
| <b>PC</b>        | -1013.507                          | -580.374                          | -433.113                          | -12.622                        | 3.778                    | -8.844                        |
| <b>PT</b>        | -1072.562                          | -580.374                          | -492.168                          | -12.305                        | 3.732                    | -8.573                        |
| <b>AZ</b>        | -1126.477                          | -505.291                          | -621.166                          | -12.369                        | 3.952                    | -8.417                        |
| <b>GZ</b>        | -1201.576                          | -580.383                          | -621.166                          | -16.810                        | 4.596                    | -12.213                       |

**Cartesian coordinates (Å) of gas phase optimized geometries at M06-2X/6-31G+(d,p) level.**

|                        |            |            |            |                        |            |            |            |
|------------------------|------------|------------|------------|------------------------|------------|------------|------------|
| <b>A</b>               |            |            | O          | 2.2512710              | -1.4922270 | 0.0000540  |            |
| G = -505.27813280 a.u. |            |            | C          | 1.2388570              | 0.6643090  | -0.0000150 |            |
| N                      | -1.7822940 | -0.1577220 | -0.0000360 | C                      | 2.5595620  | 1.3706770  | 0.0000180  |
| C                      | -1.5555030 | -1.5136640 | -0.0000160 | C                      | 0.0435840  | 1.2892250  | -0.0000210 |
| N                      | -0.2888710 | -1.8420720 | 0.0000640  | H                      | 2.4223970  | 2.4544790  | 0.0000140  |
| C                      | 0.3618430  | -0.6264970 | 0.0000050  | H                      | 3.1464140  | 1.0878300  | -0.8784450 |
| C                      | 1.7240340  | -0.2659890 | -0.0000310 | H                      | 3.1463790  | 1.0878330  | 0.8785050  |
| N                      | 2.7071080  | -1.1902070 | -0.0000210 | H                      | -0.0278430 | 2.3727430  | 0.0000310  |
| N                      | 2.0479190  | 1.0331750  | -0.0000180 | C                      | -2.4406250 | 1.3520480  | 0.0000720  |
| C                      | 1.0591190  | 1.9415260  | 0.0000030  | H                      | -3.0210520 | 1.0861480  | -0.8853090 |
| N                      | -0.2552220 | 1.7385290  | 0.0000340  | H                      | -3.0205840 | 1.0867000  | 0.8859360  |
| C                      | -0.5438110 | 0.4313690  | 0.0000350  | H                      | -2.2317580 | 2.4214330  | -0.0003190 |
| H                      | -2.3813560 | -2.2137400 | -0.0000470 | H                      | -0.0556380 | -2.3968570 | 0.0000300  |
| H                      | 3.6663090  | -0.8839300 | 0.0000140  |                        |            |            |            |
| H                      | 1.3831560  | 2.9788520  | 0.0000130  | <b>G</b>               |            |            |            |
| C                      | -3.0513290 | 0.5437560  | -0.0000120 | G = -580.35890255 a.u. |            |            |            |
| H                      | -3.1291050 | 1.1727260  | 0.8890530  | N                      | -1.9244100 | -0.4041550 | -0.0003190 |
| H                      | -3.1284310 | 1.1738570  | -0.8883280 | C                      | -2.3672810 | 0.9022270  | 0.0037080  |
| H                      | -3.8567200 | -0.1917400 | -0.0007890 | N                      | -1.3991060 | 1.7775150  | 0.0098020  |
| H                      | 2.4795440  | -2.1709510 | 0.0000290  | C                      | -0.2550970 | 1.0164190  | 0.0105820  |
|                        |            |            |            | C                      | 1.1322770  | 1.4052220  | 0.0018530  |
| <b>T</b>               |            |            |            | O                      | 1.6551380  | 2.4995870  | -0.0080550 |
| G = -492.15425449 a.u. |            |            |            | N                      | 1.9570760  | 0.2371770  | -0.0050430 |
| N                      | -1.1703360 | 0.6335890  | -0.0000890 | C                      | 1.5291880  | -1.0631330 | -0.0011550 |
| C                      | -1.2472820 | -0.7485640 | -0.0001880 | N                      | 2.5051190  | -2.0287960 | -0.0658100 |
| O                      | -2.3069660 | -1.3466320 | 0.0000810  | N                      | 0.2723870  | -1.4128840 | 0.0110640  |
| N                      | -0.0202560 | -1.3838550 | 0.0000020  | C                      | -0.5629310 | -0.3383040 | 0.0028190  |
| C                      | 1.2494690  | -0.8006240 | -0.0000180 | H                      | -3.4248330 | 1.1313020  | 0.0015860  |

|                        |            |            |            |                        |            |            |            |
|------------------------|------------|------------|------------|------------------------|------------|------------|------------|
| H                      | 3.3886810  | -1.8338700 | 0.3821600  | C                      | 1.6255960  | -0.9536310 | -0.0001390 |
| H                      | 2.1502980  | -2.9609140 | 0.0956990  | N                      | 2.5672430  | -1.9221260 | -0.0013500 |
| H                      | 2.9460600  | 0.4418030  | -0.0849100 | N                      | 0.3401960  | -1.3978310 | -0.0000640 |
| C                      | -2.7142690 | -1.6199340 | -0.0087090 | C                      | -0.5211490 | -0.4017580 | -0.0001940 |
| H                      | -2.4846880 | -2.2097460 | -0.8983710 | N                      | -0.1934110 | 0.9155340  | -0.0002830 |
| H                      | -2.4954380 | -2.2152730 | 0.8800620  | C                      | 1.1908900  | 1.3301650  | 0.0001380  |
| H                      | -3.7699660 | -1.3469740 | -0.0142370 | O                      | 1.4225320  | 2.5208470  | 0.0004650  |
| <b>C</b>               |            |            |            | C                      | -1.3445380 | 1.6897600  | -0.0002400 |
| G = -433.09259185 a.u. |            |            |            | C                      | -2.3857430 | 0.8260590  | -0.0001270 |
| N                      | -1.1095140 | 0.4457850  | -0.0000860 | N                      | -1.8740990 | -0.4716520 | -0.0002020 |
| C                      | -0.6233280 | -0.8959680 | -0.0002780 | C                      | -2.6311870 | -1.7092940 | 0.0004920  |
| O                      | -1.4438590 | -1.7971940 | 0.0001470  | H                      | 2.2900950  | -2.8885910 | 0.0039290  |
| N                      | 0.7323120  | -1.0739720 | -0.0000650 | H                      | -1.2875070 | 2.7657730  | -0.0003510 |
| C                      | 1.5394110  | -0.0372890 | 0.0000370  | H                      | -3.4487830 | 1.0066250  | -0.0001990 |
| N                      | 2.8711310  | -0.2903380 | 0.0002100  | H                      | -1.9157890 | -2.5317590 | -0.0001060 |
| C                      | 1.0837000  | 1.3252220  | 0.0000040  | H                      | -3.2553640 | -1.7684500 | 0.8949100  |
| C                      | -0.2625520 | 1.4991310  | 0.0000000  | H                      | -3.2568630 | -1.7684700 | -0.8928720 |
| H                      | 3.5535800  | 0.4470630  | -0.0005950 | H                      | 3.5369760  | -1.6534550 | 0.0035000  |
| H                      | 1.7631130  | 2.1665630  | 0.0000920  | <b>Z</b>               |            |            |            |
| H                      | -0.7212370 | 2.4833860  | 0.0000730  | G = -621.14750027 a.u. |            |            |            |
| H                      | 3.1710020  | -1.2527070 | -0.0002840 | N                      | -2.1334030 | -0.7135910 | -0.0000360 |
| C                      | -2.5567500 | 0.6119500  | 0.0000500  | C                      | 1.5830120  | -0.8172660 | 0.0000270  |
| H                      | -2.9835490 | 0.1334340  | -0.8832690 | C                      | 1.9154050  | 0.5998800  | -0.0000930 |
| H                      | -2.9833960 | 0.1334960  | 0.8834810  | O                      | 3.0352470  | 1.0806210  | -0.0002060 |
| H                      | -2.7890340 | 1.6777150  | 0.0000380  | N                      | 0.8065740  | 1.4750050  | -0.0000700 |
| <b>P</b>               |            |            |            | C                      | -0.5118170 | 1.1373930  | 0.0000900  |
| G = -580.35329189 a.u. |            |            |            | N                      | -1.4055410 | 2.1383580  | 0.0006300  |
| N                      | 2.0677510  | 0.3023260  | 0.0001690  | C                      | -0.7949680 | -0.2330790 | 0.0001750  |
|                        |            |            |            | C                      | 0.2750830  | -1.1780810 | 0.0001610  |

C 2.7342320 -1.7763150 0.0000610  
O -3.0620570 0.1065940 -0.0001360  
O -2.3185060 -1.9211200 -0.0001910  
H -1.1084310 3.1001700 -0.0022410  
H -0.0073700 -2.2258920 0.0002400  
H 2.3773530 -2.8078680 -0.0001110  
H 3.3674780 -1.6173250 -0.8779630  
H 3.3672420 -1.6175590 0.8783020  
H -2.3870910 1.8931200 -0.0005430  
H 1.0742530 2.4529950 0.0003770

**P:Z pair**

G = -1201.55027220 a.u.

N 1.3017870 0.2719550 -0.0012810  
C 2.0912340 1.3692780 -0.0085810  
N 1.4791040 2.5491760 -0.0140790  
N 3.4500030 1.3831820 -0.0105120  
C 3.9681950 0.1769300 -0.0035610  
N 3.2622180 -0.9867210 0.0057310  
C 1.8392340 -0.9576220 0.0058500  
O 1.2413440 -2.0260700 0.0124620  
C 4.1308260 -2.0717320 0.0127970  
C 5.3781150 -1.5557560 0.0075280  
N 5.2776870 -0.1641250 -0.0042950  
C 6.3679740 0.7937640 -0.0060790  
N -4.6091360 -1.7636120 -0.0058070  
C -3.5690610 1.7947090 0.0064020  
C -2.1273910 1.6677320 0.0052330  
O -1.3502300 2.6272080 0.0070240  
N -1.6188150 0.3736670 0.0018130

C -2.3412120 -0.7819910 -0.0016540  
N -1.6601100 -1.9251380 -0.0046210  
C -3.7426900 -0.6383130 -0.0020120  
C -4.3157510 0.6596680 0.0024440  
C -4.1290560 3.1844090 0.0114140  
O -4.1184660 -2.8989730 -0.0099570  
O -5.8170080 -1.5700390 -0.0049780  
H 2.0499200 3.3776020 -0.0168510  
H 3.7577500 -3.0817160 0.0199400  
H 6.3387360 -2.0448910 0.0095270  
H 5.9287360 1.7868320 -0.0971320  
H -0.6386800 -1.9382840 0.0006390  
H -5.3992940 0.7101620 0.0026240  
H 6.9333150 0.7282270 0.9258270  
H 7.0289980 0.6054710 -0.8540820  
H -5.2204140 3.1620530 0.0124570  
H -3.7850780 3.7375440 0.8904460  
H -3.7868500 3.7433520 -0.8646260  
H -2.2041220 -2.7759870 -0.0062980  
H 0.4543900 2.6049660 -0.0075250  
H -0.5841860 0.3125090 0.0013250

**GC pair**

G = -1013.50014902 a.u.

N -4.3693880 -0.6699380 -0.0090250  
C -2.9674100 -0.7986890 -0.0018530  
O -2.4923390 -1.9367690 -0.0023600  
N -2.2143840 0.3283920 0.0050650  
C -2.7787370 1.5348790 0.0042360  
N -1.9767060 2.6001770 0.0101640

C -4.2094470 1.6928350 -0.0026900  
 C -4.9487190 0.5580710 -0.0091830  
 N 4.6337920 -0.3202420 -0.0125390  
 C 4.9393700 1.0276190 -0.0164120  
 N 3.8884970 1.7983220 -0.0102950  
 C 2.8260230 0.9206410 -0.0002380  
 C 1.4132730 1.1449120 0.0070540  
 O 0.7978210 2.2138620 0.0077780  
 N 0.7048720 -0.0653020 0.0139150  
 C 1.2565510 -1.3217110 0.0134900  
 N 0.3909470 -2.3540700 0.0243630  
 N 2.5562480 -1.5457250 0.0062400  
 C 3.2715300 -0.3993100 -0.0008490  
 H -2.3657690 3.5282950 0.0083130  
 H -4.6761280 2.6686020 -0.0030420  
 H -6.0338120 0.5715290 -0.0149100  
 H 5.9683370 1.3631300 -0.0256450  
 H -0.6212910 -2.2258650 0.0129270  
 H 0.7872020 -3.2786970 0.0115500  
 H -0.3233510 0.0297070 0.0160680  
 H -0.9512910 2.4772600 0.0113290  
 C -5.1510070 -1.9015030 -0.0161500  
 H -4.9051480 -2.4900740 -0.9015260  
 H -4.9119220 -2.4956410 0.8673450  
 H -6.2101170 -1.6424680 -0.0194110  
 C 5.5439360 -1.4468990 -0.0071000  
 H 5.4557940 -2.0027030 0.9292990  
 H 5.3119180 -2.1150780 -0.8388350  
 H 6.5624090 -1.0711120 -0.1138430

**A:T pair**

G = -997.46119449 a.u.

N 3.9188300 -1.2907980 0.0013090  
 C 2.5302680 -1.3173240 -0.0008400  
 O 1.9049210 -2.3654120 -0.0016140  
 N 1.9286100 -0.0819700 -0.0021850  
 C 2.5550570 1.1474540 -0.0010440  
 O 1.8985350 2.1884450 -0.0020020  
 C 4.0158550 1.1117930 0.0012130  
 C 4.7565000 2.4136740 0.0022720  
 C 4.6102250 -0.1010740 0.0022800  
 N -4.8613840 -0.4017860 0.0020860  
 C -5.1460850 0.9434210 0.0033480  
 N -4.0858800 1.7101410 0.0021460  
 C -3.0372760 0.8163410 -0.0003350  
 C -1.6359760 0.9898340 -0.0020550  
 N -1.0517910 2.1945750 -0.0020330  
 N -0.8759990 -0.1219410 -0.0037720  
 C -1.4580330 -1.3365550 -0.0035810  
 N -2.7536310 -1.6174710 -0.0019810  
 C -3.4943670 -0.4983850 -0.0003730  
 H 5.8366000 2.2486590 0.0036000  
 H 4.4886000 3.0078290 0.8806030  
 H 4.4907710 3.0079870 -0.8766070  
 H 5.6916770 -0.2020610 0.0040040  
 H -6.1703180 1.2940070 0.0053720  
 H -0.0349080 2.2780700 -0.0025250  
 H -0.7631910 -2.1737680 -0.0048160  
 C -5.7863390 -1.5186280 0.0024260  
 H -5.6375680 -2.1263590 -0.8923950

H -5.6193680 -2.1394210 0.8849060  
H -6.8045870 -1.1281520 0.0157100  
C 4.5951390 -2.5827840 0.0027450  
H 4.3097080 -3.1539090 0.8881970  
H 4.3109540 -3.1550790 -0.8823340  
H 5.6712080 -2.4099790 0.0034020  
H -1.6345190 3.0164820 -0.0002150  
H 0.8761910 -0.0904190 -0.0033160

**P:C pair**

G = -1013.48043106 a.u.

N -0.9419180 0.5724550 -0.0239970  
C -1.1419690 -0.7598260 -0.0205100  
N -0.0566250 -1.5325590 -0.0298950  
N -2.3485450 -1.3953280 -0.0082320  
C -3.3601290 -0.5580370 0.0006470  
N -3.2643650 0.7995640 -0.0009220  
C -1.9765660 1.4325500 -0.0130990  
O -1.9279550 2.6503160 -0.0124470  
C -4.5318220 1.3662130 0.0128230  
C -5.4087890 0.3370400 0.0222270  
N -4.6832950 -0.8544500 0.0137110  
C -5.2175850 -2.2031620 0.0267680  
H -0.1696220 -2.5326960 -0.0244960  
H -4.6611990 2.4357810 0.0134480  
H -6.4869620 0.3335730 0.0332960  
H -4.3731280 -2.8908190 -0.0215190  
H -5.7786850 -2.3793340 0.9474890  
H -5.8660850 -2.3589310 -0.8382890  
H 0.8779190 -1.1070330 -0.0328420

N 4.8849350 -0.4146770 0.0151790  
C 3.5773700 -0.9646520 -0.0101340  
O 3.4595980 -2.1834610 -0.0214880  
N 2.5265380 -0.0999990 -0.0201390  
C 2.7111970 1.2144500 -0.0047120  
N 1.6269770 1.9964740 -0.0140660  
C 4.0304090 1.7936410 0.0203510  
C 5.0731560 0.9282060 0.0291760  
H 1.7088720 2.9990440 0.0021380  
H 4.1859140 2.8639420 0.0315240  
H 6.1054320 1.2640830 0.0476000  
H 0.6943090 1.5617450 -0.0239380  
C 5.9942240 -1.3583650 0.0252180  
H 5.9238070 -2.0045150 0.9022610  
H 5.9528720 -1.9892740 -0.8646030  
H 6.9305060 -0.7991090 0.0454070

**P:T pair**

G = -1072.53217860 a.u.

N -0.8695260 -0.2623260 0.5336900  
C -1.4503240 -1.2936680 -0.0986100  
N -0.6642810 -2.3427700 -0.3845490  
N -2.7479520 -1.3909540 -0.4922650  
C -3.4469000 -0.3208460 -0.1772200  
N -2.9700380 0.7628430 0.4881190  
C -1.5907770 0.8241670 0.8970180  
O -1.2142120 1.8005160 1.5077200  
C -3.9796600 1.6994030 0.6567590  
C -5.0862590 1.1738010 0.0839960  
N -4.7552680 -0.0796620 -0.4322510

|   |            |            |            |   |            |            |            |
|---|------------|------------|------------|---|------------|------------|------------|
| C | -5.6343010 | -0.9943210 | -1.1360650 | C | 5.3535630  | -1.1094570 | -0.4178440 |
| H | -1.0849070 | -3.1475780 | -0.8178380 | N | 4.3812520  | -1.7729760 | 0.1534040  |
| H | -3.7907800 | 2.6323990  | 1.1616870  | C | 3.3867680  | -0.8303280 | 0.2927240  |
| H | -6.0843320 | 1.5706680  | -0.0105850 | C | 2.0999150  | -0.8717980 | 0.8450020  |
| H | -5.0527080 | -1.8814880 | -1.3864940 | N | 1.5450240  | -2.0228090 | 1.3475720  |
| H | -6.4743820 | -1.2758990 | -0.4973830 | N | 1.3629970  | 0.2418820  | 0.8372610  |
| H | -6.0050770 | -0.5305710 | -2.0530140 | C | 1.8779870  | 1.3799850  | 0.3197980  |
| H | 0.2835810  | -2.3786330 | -0.0104200 | N | 3.0810680  | 1.5442160  | -0.2129220 |
| N | 4.0198900  | -1.0190560 | 0.1940570  | C | 3.7910280  | 0.4111800  | -0.2044530 |
| C | 2.6438610  | -1.0795920 | 0.2945180  | H | 6.3148490  | -1.5265860 | -0.6905400 |
| O | 2.0765280  | -2.1308760 | 0.5893210  | H | 0.8928300  | -1.8882040 | 2.1105210  |
| N | 1.9784770  | 0.0877260  | 0.0405190  | H | 1.2096120  | 2.2379980  | 0.3463420  |
| C | 2.5404120  | 1.2916130  | -0.3911980 | C | 5.9165250  | 1.2242090  | -1.2646710 |
| O | 1.8442530  | 2.2511580  | -0.6635840 | H | 5.4236350  | 1.6464020  | -2.1420430 |
| C | 4.0065010  | 1.2862310  | -0.4843380 | H | 6.1119290  | 2.0220960  | -0.5458980 |
| C | 4.6794840  | 2.5563980  | -0.9027510 | H | 6.8561810  | 0.7568620  | -1.5603900 |
| C | 4.6576240  | 0.1451270  | -0.1891610 | H | 2.1916930  | -2.7908630 | 1.4765070  |
| H | 5.7642960  | 2.4312260  | -0.9427740 | N | -4.3654950 | -1.6593520 | -0.5677650 |
| H | 4.4395680  | 3.3633880  | -0.2044240 | C | -3.3876800 | 1.8730690  | 0.0311660  |
| H | 4.3204120  | 2.8729050  | -1.8861610 | C | -1.9755520 | 1.7282700  | 0.3528840  |
| H | 5.7401800  | 0.0750820  | -0.2392230 | O | -1.2025540 | 2.6452060  | 0.6040380  |
| C | 4.7561840  | -2.2509100 | 0.4507630  | N | -1.4903310 | 0.4134180  | 0.3706370  |
| H | 4.4392670  | -2.6746750 | 1.4043610  | C | -2.1811930 | -0.7150390 | 0.0738630  |
| H | 4.5637360  | -2.9852100 | -0.3355130 | N | -1.5017880 | -1.8739180 | 0.1241930  |
| H | 5.8200150  | -2.0159250 | 0.4837300  | C | -3.5399320 | -0.5540380 | -0.2367540 |
| H | 0.9544090  | 0.0629010  | 0.2128930  | C | -4.1070570 | 0.7548280  | -0.2441660 |
|   |            |            |            | C | -3.9425760 | 3.2650190  | 0.0228280  |
|   |            |            |            | O | -3.8726960 | -2.7969580 | -0.5691780 |
|   |            |            |            | O | -5.5406650 | -1.4513220 | -0.8390860 |
|   |            |            |            | H | -0.4940820 | -1.8777120 | 0.2182250  |

**A:Z pair**

G = -1126.45199181 a.u.

N 5.0658000 0.2128230 -0.6623110

|   |            |            |            |   |            |            |            |
|---|------------|------------|------------|---|------------|------------|------------|
| H | -5.1612040 | 0.8242510  | -0.4924080 | N | -3.6659080 | -2.3106530 | -0.0263890 |
| H | -5.0020520 | 3.2572030  | -0.2412830 | C | -3.1066120 | -1.0527330 | -0.0499910 |
| H | -3.8231400 | 3.7344220  | 1.0040990  | C | -1.7498900 | -0.6248700 | -0.1228900 |
| H | -3.4009250 | 3.8909750  | -0.6928730 | O | -0.7126970 | -1.3060740 | -0.1781350 |
| H | -1.9967890 | -2.7124370 | -0.1483130 | N | -1.6505620 | 0.7673820  | -0.1237430 |
| H | -0.4956920 | 0.3318120  | 0.6391290  | C | -2.6976330 | 1.6449830  | -0.0422600 |

### G:Z pair

G = -1201.55414663 a.u.

|   |            |            |            |               |            |            |            |
|---|------------|------------|------------|---------------|------------|------------|------------|
| N | 5.1013100  | -1.3581670 | 0.0787220  | C             | -4.0924370 | -0.0672440 | 0.0256900  |
| C | 3.1868450  | 1.8331040  | 0.0298870  | H             | -5.7175730 | -2.8455520 | 0.0996770  |
| C | 1.8337990  | 1.3358100  | -0.0463440 | H             | -1.3899730 | 3.2321930  | 0.0239110  |
| O | 0.8150270  | 2.0515840  | -0.0794350 | H             | -3.0825400 | 3.6258490  | 0.1264130  |
| N | 1.6811830  | -0.0380050 | -0.0859420 | H             | -0.7008810 | 1.1798620  | -0.1555040 |
| C | 2.6685470  | -0.9711170 | -0.0471880 | C             | -6.5881900 | -0.1433980 | 0.2041520  |
| N | 2.2665630  | -2.2461100 | -0.0882270 | H             | -6.7079540 | 0.3324480  | 1.1799790  |
| C | 3.9818060  | -0.4801190 | 0.0297040  | H             | -6.7163190 | 0.6076650  | -0.5770420 |
| C | 4.2007410  | 0.9212060  | 0.0643120  | H             | -7.3384510 | -0.9255900 | 0.0846720  |
| C | 3.3805350  | 3.3192500  | 0.0662650  |               |            |            |            |
| O | 4.8945510  | -2.5762780 | 0.0488460  | <b>PZ//CG</b> |            |            |            |
| O | 6.2215970  | -0.8739710 | 0.1490900  | C             | -5.4474970 | -0.8647130 | 1.6632250  |
| H | 1.2760190  | -2.4560320 | -0.1320660 | N             | -4.3592230 | -1.6735460 | 1.1454390  |
| H | 5.2337100  | 1.2501840  | 0.1214830  | C             | -4.4307080 | -2.9196740 | 0.5530820  |
| H | 4.4428350  | 3.5677730  | 0.1080190  | N             | -3.2644510 | -3.4187090 | 0.2498280  |
| H | 2.9424950  | 3.7887580  | -0.8197670 | C             | -2.3676430 | -2.4572330 | 0.6632790  |
| H | 2.8825800  | 3.7553140  | 0.9377630  | C             | -0.9436430 | -2.3864860 | 0.5572020  |
| H | 2.9664750  | -2.9729810 | -0.0591080 | O             | -0.1564740 | -3.2144860 | 0.0884260  |
| H | 0.7105750  | -0.4174170 | -0.1379340 | N             | -0.4525930 | -1.1765530 | 1.0674690  |
| N | -5.2727320 | -0.7439960 | 0.0925660  | C             | -1.2052020 | -0.1682420 | 1.6139380  |
| C | -4.9467980 | -2.0868260 | 0.0585160  | N             | -0.5273120 | 0.9243070  | 2.0220790  |
|   |            |            |            | N             | -2.5185490 | -0.2134650 | 1.7113160  |



|   |            |            |            |   |            |            |            |
|---|------------|------------|------------|---|------------|------------|------------|
| C | -3.0314660 | -1.3662160 | 1.2204900  | H | 0.4886500  | 0.9315330  | 2.1047880  |
| C | -4.0164130 | 4.1732800  | 0.7536820  | H | -3.6250260 | 5.0650430  | 0.2546210  |
| C | -4.4517770 | 1.9920740  | -0.4532900 | H | -5.5245740 | 2.1165880  | -0.3421600 |
| C | -4.0118690 | 0.8122130  | -1.1097810 | H | -1.0480190 | -0.5785200 | -1.9087340 |
| C | -2.6291190 | 0.5917540  | -1.2964270 | H | 6.8288490  | 0.5625880  | -0.5914250 |
| N | -2.0644330 | -0.4648150 | -1.8726020 | H | 5.8411660  | -1.0854250 | -2.8064060 |
| N | -1.7976440 | 1.5712020  | -0.8385180 | H | 2.1742100  | 3.6574890  | 0.6659270  |
| C | -2.1732510 | 2.7027090  | -0.1293680 | H | 4.6776120  | 1.2610320  | 3.5535800  |
| O | -1.2983050 | 3.4573890  | 0.3165710  | H | 6.2939680  | -0.8985200 | 1.5115230  |
| C | 6.1895620  | 1.2173620  | -1.1905000 | H | 5.2798040  | -2.8350180 | 0.2969880  |
| N | 4.9997100  | 0.5055920  | -1.6109310 | H | 3.1279380  | -3.7864150 | -0.4575260 |
| C | 4.9435200  | -0.6372370 | -2.4108950 | H | -5.1055920 | 4.2413810  | 0.7980840  |
| C | 1.5041360  | 0.0271030  | -1.6214920 | H | -3.6204190 | 4.1833340  | 1.7742030  |
| O | 0.7933060  | -0.8500660 | -2.0957930 | H | -6.3343890 | -1.0199040 | 1.0475630  |
| N | 1.1015430  | 1.0989420  | -0.9196170 | H | -5.6566460 | -1.1196390 | 2.7058860  |
| C | 2.0008290  | 1.9703090  | -0.4173720 | H | 6.1281830  | 1.0816560  | 2.5208410  |
| N | 1.5207690  | 3.0237740  | 0.2362440  | H | 4.7346040  | 2.0698270  | 1.9750160  |
| N | 3.3575850  | 1.8738910  | -0.5243850 | H | 6.7452850  | 1.5742200  | -2.0606090 |
| C | 3.7379640  | 0.8551710  | -1.2619920 | H | 5.8699190  | 2.0694390  | -0.5892230 |
| C | 5.0412540  | 1.1781920  | 2.5282500  | N | 2.9087070  | -0.0562440 | -1.8391140 |
| N | 4.4634910  | 0.0033850  | 1.8875850  | C | 3.6465330  | -0.9913260 | -2.5534210 |
| C | 5.2219180  | -0.9921570 | 1.3642380  | H | 0.5080280  | 3.1615070  | 0.3285870  |
| C | 4.6695590  | -2.0401070 | 0.7047100  | H | 3.1584400  | -1.7999380 | -3.0724460 |
| C | 3.2343040  | -2.0410370 | 0.5769910  | N | -4.9749780 | -0.1504370 | -1.4933730 |
| N | 2.6057140  | -3.0045990 | -0.0965080 | O | -6.1610360 | 0.0724980  | -1.2482550 |
| N | 2.4933160  | -1.0688080 | 1.1068410  | O | -4.6029220 | -1.1924670 | -2.0459330 |
| C | 3.0568240  | -0.0473210 | 1.7992680  | H | -2.6718490 | -1.2273840 | -2.1431230 |
| O | 2.4087300  | 0.8491710  | 2.3392500  | H | -0.7759020 | 1.4056950  | -0.8845920 |
| H | -5.1489990 | 0.1842410  | 1.6058260  | H | 1.5680950  | -3.0463210 | -0.0968790 |
| H | -5.3877240 | -3.3853070 | 0.3582330  | H | 0.5714050  | -1.0684380 | 1.0391580  |

|               |            |            |            |   |            |            |            |
|---------------|------------|------------|------------|---|------------|------------|------------|
| H             | -1.0656420 | 1.6680010  | 2.4376950  | C | -1.5669830 | -1.3234650 | 1.4023160  |
| C             | -3.5943700 | 2.9288380  | 0.0325520  | O | -0.8445050 | -2.3180700 | 1.3812900  |
|               |            |            |            | N | -1.0041620 | -0.0403390 | 1.4389370  |
| <b>GC//CG</b> |            |            |            | C | -1.6964020 | 1.1429640  | 1.3989880  |
| C             | 5.9746410  | 0.7663860  | -1.4050710 | N | -0.9632220 | 2.2683460  | 1.4210000  |
| N             | 4.9416310  | -0.2454700 | -1.3827100 | N | -3.0189070 | 1.2146290  | 1.3609080  |
| C             | 5.0887070  | -1.6188380 | -1.3650290 | C | -3.5953910 | -0.0058210 | 1.3852260  |
| N             | 3.9524210  | -2.2606910 | -1.3628160 | C | -4.5383920 | 2.5376600  | -1.6431210 |
| C             | 3.0006360  | -1.2641960 | -1.3906830 | N | -3.9284140 | 1.2183740  | -1.7364380 |
| C             | 1.5670130  | -1.3248000 | -1.4012440 | C | -4.6639650 | 0.0771620  | -1.8094020 |
| O             | 0.8445670  | -2.3194160 | -1.3794630 | C | -4.0834850 | -1.1448260 | -1.7940780 |
| N             | 1.0041550  | -0.0417280 | -1.4388750 | C | -2.6504250 | -1.1795080 | -1.6622470 |
| C             | 1.6963570  | 1.1416360  | -1.3998860 | N | -2.0121220 | -2.3464240 | -1.5783950 |
| N             | 0.9631230  | 2.2669550  | -1.4227960 | N | -1.9287010 | -0.0570120 | -1.6309770 |
| N             | 3.0188580  | 1.2133790  | -1.3618940 | C | -2.5277890 | 1.1590150  | -1.6514740 |
| C             | 3.5953780  | -0.0070760 | -1.3852000 | O | -1.9055060 | 2.2251480  | -1.5897770 |
| C             | 4.5383220  | 2.5392290  | 1.6410490  | H | 5.9394050  | 1.3706750  | -0.4938710 |
| N             | 3.9284120  | 1.2199800  | 1.7352750  | H | 6.0715800  | -2.0729350 | -1.3622340 |
| C             | 4.6639890  | 0.0788490  | 1.8092170  | H | -0.0598720 | 2.2483920  | -1.4019320 |
| C             | 4.0835190  | -1.1431610 | 1.7950040  | H | 4.1186820  | 3.1957600  | 2.4042600  |
| C             | 2.6504630  | -1.1779830 | 1.6632150  | H | 5.7398630  | 0.2114560  | 1.8775780  |
| N             | 2.0121820  | -2.3449840 | 1.5803580  | H | 4.6697660  | -2.0507370 | 1.8407890  |
| N             | 1.9287120  | -0.0555320 | 1.6309620  | H | 0.9978060  | -2.3615990 | 1.4205540  |
| C             | 2.5277760  | 1.1605240  | 1.6504200  | H | -5.9430930 | 1.3675450  | 0.4902040  |
| O             | 1.9054790  | 2.2265960  | 1.5878890  | H | -6.0715220 | -2.0718000 | 1.3642920  |
| C             | -5.9746600 | 0.7676130  | 1.4044290  | H | -1.4539080 | 3.1208960  | 1.2048300  |
| N             | -4.9416430 | -0.2442620 | 1.3831530  | H | -4.1184100 | 3.1938110  | -2.4064630 |
| C             | -5.0886700 | -1.6176520 | 1.3665200  | H | -5.7398340 | 0.2097120  | -1.8779380 |
| N             | -3.9523600 | -2.2594640 | 1.3647080  | H | -4.6697180 | -2.0524490 | -1.8391200 |
| C             | -3.0006060 | -1.2629150 | 1.3916940  | H | -2.5401320 | -3.1800880 | -1.3704100 |

|              |            |            |            |   |            |            |            |
|--------------|------------|------------|------------|---|------------|------------|------------|
| H            | -5.6153580 | 2.4359240  | -1.7895650 | C | -4.9649940 | 0.8903730  | -1.5449140 |
| H            | -4.3262790 | 2.9639880  | -0.6580480 | C | -1.3880350 | 0.6751260  | -1.5130890 |
| H            | 6.9461320  | 0.2749260  | -1.4781410 | O | -1.0157960 | -0.2896450 | -2.1706280 |
| H            | 5.8340700  | 1.4265500  | -2.2637800 | N | -0.6026750 | 1.5344160  | -0.8404360 |
| H            | 5.6153590  | 2.4375790  | 1.7870400  | C | -1.1417170 | 2.5504410  | -0.1339190 |
| H            | 4.3257350  | 2.9650980  | 0.6558820  | N | -0.2914130 | 3.3637570  | 0.4930970  |
| H            | -6.9458470 | 0.2765360  | 1.4836640  | N | -2.4665530 | 2.8127560  | 0.0094820  |
| H            | -5.8306550 | 1.4318360  | 2.2593980  | C | -3.2255460 | 1.9692530  | -0.6571630 |
| H            | -0.9977380 | -2.3629060 | -1.4186110 | C | 5.3317370  | 3.0274830  | -0.5245210 |
| H            | 1.4537890  | 3.1197600  | -1.2075990 | C | 4.8895170  | 0.5966150  | -1.0759290 |
| H            | 0.0597670  | 2.2497830  | 1.3999620  | C | 4.0126240  | -0.4875250 | -1.3576320 |
| H            | 2.5402090  | -3.1788060 | 1.3730550  | C | 2.6163600  | -0.2598520 | -1.4355600 |
| H            | 0.0309700  | -0.0133000 | 1.4702530  | N | 1.6843090  | -1.1430690 | -1.7670400 |
| H            | -0.0309770 | -0.0147480 | -1.4702070 | N | 2.2013380  | 1.0012420  | -1.1249510 |
|              |            |            |            | C | 3.0079410  | 2.0681880  | -0.7511470 |
| <b>GC/PZ</b> |            |            |            | O | 2.4849140  | 3.1247170  | -0.3845960 |
| C            | -6.3288560 | -0.8716330 | 1.1233920  | C | 3.9578780  | 1.4785030  | 2.4818410  |
| N            | -5.1967250 | -1.5592220 | 0.5448430  | N | 3.4248350  | 0.1871190  | 2.0564450  |
| C            | -5.2002990 | -2.6361790 | -0.3213670 | C | 4.2230710  | -0.9035620 | 1.9001200  |
| N            | -4.0041060 | -3.0485910 | -0.6378380 | C | 3.7267470  | -2.0996130 | 1.5020630  |
| C            | -3.1597560 | -2.2029880 | 0.0474580  | C | 2.3206630  | -2.1466940 | 1.2114500  |
| C            | -1.7280220 | -2.1707460 | 0.1532320  | N | 1.7598450  | -3.2611370 | 0.7312900  |
| O            | -0.8933590 | -2.9282350 | -0.3381310 | N | 1.5363910  | -1.0869630 | 1.4078090  |
| N            | -1.3097720 | -1.1063450 | 0.9668400  | C | 2.0425590  | 0.0948790  | 1.8378190  |
| C            | -2.1199070 | -0.2049940 | 1.6048130  | O | 1.3458620  | 1.0992250  | 2.0260560  |
| N            | -1.4994780 | 0.7364410  | 2.3464770  | H | -6.2810570 | 0.1950490  | 0.8862940  |
| N            | -3.4411440 | -0.2340520 | 1.5341750  | H | -6.1303290 | -3.0705420 | -0.6654990 |
| C            | -3.8844470 | -1.2627660 | 0.7755420  | H | -0.4978720 | 0.9157920  | 2.2244840  |
| C            | -5.4166640 | 2.8426320  | 0.0477390  | H | -5.0436650 | 3.8640350  | -0.0398630 |
| N            | -4.5728920 | 1.9575360  | -0.7328560 | H | -6.0067080 | 0.6863140  | -1.7370400 |

|   |            |            |            |               |            |            |            |
|---|------------|------------|------------|---------------|------------|------------|------------|
| H | 0.7140480  | 3.2547470  | 0.3497180  | <b>GC//GC</b> |            |            |            |
| H | 5.0989840  | 3.4712620  | 0.4490890  | C             | 4.5238170  | -2.1423770 | -1.1340930 |
| H | 5.9523450  | 0.3746990  | -1.0767270 | N             | 3.1587840  | -2.6327200 | -1.2203680 |
| H | 1.9746440  | -2.0932130 | -1.9465630 | C             | 2.7004200  | -3.8847220 | -0.8823850 |
| H | 3.7198280  | 1.6590420  | 3.5334350  | N             | 1.3964820  | -3.9842100 | -0.8741120 |
| H | 5.2807410  | -0.7487400 | 2.0882790  | C             | 0.9681580  | -2.7185530 | -1.2147590 |
| H | 4.3745700  | -2.9502740 | 1.3333030  | C             | -0.3399130 | -2.1553190 | -1.2464660 |
| H | 2.3604850  | -4.0018250 | 0.4025970  | O             | -1.4266140 | -2.7213710 | -1.0579860 |
| H | 3.5032770  | 2.2680980  | 1.8809890  | N             | -0.3049400 | -0.7800050 | -1.4854790 |
| H | 5.0391360  | 1.4725980  | 2.3343650  | C             | 0.8285370  | -0.0335730 | -1.6868260 |
| H | 6.3824830  | 2.7285380  | -0.5381360 | N             | 0.6363210  | 1.2897390  | -1.9291520 |
| H | 5.1810150  | 3.8161920  | -1.2682660 | N             | 2.0417000  | -0.5386930 | -1.6790370 |
| H | -7.2457430 | -1.2958090 | 0.7109040  | C             | 2.0501460  | -1.8640700 | -1.4114830 |
| H | -6.3305650 | -0.9860320 | 2.2098670  | C             | 5.1440380  | 3.9664100  | -0.3044200 |
| H | -6.4336070 | 2.7884250  | -0.3420790 | N             | 4.8767920  | 2.6161050  | 0.1459530  |
| H | -5.3992060 | 2.5431100  | 1.0997590  | C             | 5.7663720  | 1.5697400  | 0.2870290  |
| H | -2.0863770 | 1.4936060  | 2.6613000  | N             | 5.2066180  | 0.4685560  | 0.7061460  |
| H | -0.2813150 | -1.0389000 | 1.1010490  | C             | 3.8762820  | 0.7986090  | 0.8556590  |
| H | 0.7995060  | -3.2133850 | 0.3723220  | C             | 2.7403360  | 0.0091920  | 1.2248620  |
| H | 1.1768590  | 1.1878690  | -1.0503820 | O             | 2.6903870  | -1.1992470 | 1.4675190  |
| H | 0.6958640  | -0.8793160 | -1.8371170 | N             | 1.5735840  | 0.7846310  | 1.2771310  |
| N | 4.5575970  | -1.7855480 | -1.4317730 | C             | 1.4753000  | 2.1093940  | 0.9310930  |
| O | 5.7616090  | -1.9344650 | -1.2318750 | N             | 0.2607610  | 2.6742310  | 1.0482940  |
| O | 3.8037030  | -2.7486010 | -1.6454380 | N             | 2.5001320  | 2.8292160  | 0.5047900  |
| H | -0.6638050 | 4.1606960  | 0.9823500  | C             | 3.6545710  | 2.1268030  | 0.5091270  |
| N | -2.7789230 | 0.9361750  | -1.4237100 | C             | -4.5010840 | 0.0900250  | 2.0975670  |
| C | -3.8561210 | 0.2516050  | -1.9779880 | N             | -3.2853630 | -0.6970530 | 1.9623050  |
| H | -3.7095010 | -0.6247640 | -2.5899790 | C             | -3.3086220 | -2.0600760 | 1.9639610  |
| C | 4.4446080  | 1.8526440  | -0.8079940 | C             | -2.1733830 | -2.7852180 | 1.8831440  |
|   |            |            |            | C             | -0.9388400 | -2.0494750 | 1.8019060  |

|   |            |            |            |   |            |            |            |
|---|------------|------------|------------|---|------------|------------|------------|
| N | 0.2252640  | -2.7003760 | 1.7635440  | H | -6.2725360 | 2.3137980  | -1.1498220 |
| N | -0.9191850 | -0.7159990 | 1.7860060  | H | -6.2839500 | -0.1700750 | -1.4337610 |
| C | -2.0717170 | -0.0025930 | 1.8503230  | H | -4.8151310 | -2.1715450 | -1.4283640 |
| O | -2.1103270 | 1.2328220  | 1.8180810  | H | -5.3608440 | -0.5546530 | 1.9058410  |
| C | -4.1873080 | 3.8698560  | -0.7916010 | H | -4.5719340 | 0.5192310  | 3.1011290  |
| N | -4.2083550 | 2.4217290  | -0.9657040 | H | 5.2057020  | -2.9088640 | -1.5075160 |
| C | -5.3594450 | 1.7269920  | -1.1454080 | H | 4.6026820  | -1.2465260 | -1.7513040 |
| C | -5.3619120 | 0.3790450  | -1.2969760 | H | 6.2234740  | 4.0983560  | -0.3910930 |
| C | -4.0837160 | -0.2786350 | -1.2243170 | H | 4.6764280  | 4.1451070  | -1.2757200 |
| N | -3.9959140 | -1.6134320 | -1.2534050 | H | -3.6372430 | 4.1130210  | 0.1189420  |
| N | -2.9547760 | 0.4112420  | -1.1018980 | H | -5.2144400 | 4.2281250  | -0.7161610 |
| C | -2.9603500 | 1.7672050  | -1.0276800 | H | 1.4720730  | 1.8512440  | -1.8350510 |
| O | -1.9410830 | 2.4547290  | -1.0166010 | H | -1.2161930 | -0.3034340 | -1.3990790 |
| H | 4.7639140  | -1.8745300 | -0.1026240 | H | 0.1500390  | 3.5794240  | 0.6199940  |
| H | 3.3919590  | -4.6860210 | -0.6564490 | H | 0.7044150  | 0.2758610  | 1.5164370  |
| H | -0.2315750 | 1.7210310  | -1.6085140 | H | 1.0970980  | -2.1705340 | 1.6526380  |
| H | 4.7446270  | 4.6813400  | 0.4173810  | H | -3.0648070 | -2.0606460 | -1.2055110 |
| H | 6.8181960  | 1.7006580  | 0.0682660  |   |            |            |            |
| H | -0.5830610 | 2.1263480  | 1.2369300  |   |            |            |            |
| H | -4.4802330 | 0.9085790  | 1.3774520  |   |            |            |            |
| H | -4.2911290 | -2.5160090 | 2.0294040  |   |            |            |            |
| H | -2.1873460 | -3.8658230 | 1.8524050  |   |            |            |            |
| H | 0.2393130  | -3.6731520 | 1.4890330  |   |            |            |            |
| H | -3.6838760 | 4.3415550  | -1.6376320 |   |            |            |            |

**Cartesian coordinates (Å) of solvent phase optimized geometries at M06-2X/6-31G+(d,p) level.**

|                        |            |            |            |                        |            |            |            |
|------------------------|------------|------------|------------|------------------------|------------|------------|------------|
| <b>A</b>               |            |            |            | O                      | 2.2505970  | -1.4987350 | 0.0002280  |
| G = -505.29145873 a.u. |            |            |            | C                      | 1.2379210  | 0.6599570  | -0.0001040 |
| N                      | -1.7828780 | -0.1552020 | -0.0000330 | C                      | 2.5521180  | 1.3799490  | -0.0000200 |
| C                      | -1.5627740 | -1.5076210 | -0.0000450 | C                      | 0.0394670  | 1.2856820  | -0.0000990 |
| N                      | -0.2927000 | -1.8397630 | 0.0000800  | H                      | 2.3991640  | 2.4608400  | 0.0000160  |
| C                      | 0.3627960  | -0.6264840 | 0.0000020  | H                      | 3.1415490  | 1.1104710  | -0.8812830 |
| C                      | 1.7286370  | -0.2722310 | -0.0000330 | H                      | 3.1414810  | 1.1104030  | 0.8812670  |
| N                      | 2.7104210  | -1.1915160 | -0.0000110 | H                      | -0.0327120 | 2.3682230  | -0.0000320 |
| N                      | 2.0508910  | 1.0327900  | -0.0000220 | C                      | -2.4390440 | 1.3580170  | 0.0000660  |
| C                      | 1.0633450  | 1.9430200  | 0.0000010  | H                      | -3.0155660 | 1.0988680  | -0.8889780 |
| N                      | -0.2505770 | 1.7400780  | 0.0000280  | H                      | -3.0153460 | 1.0988310  | 0.8892460  |
| C                      | -0.5451860 | 0.4302880  | 0.0000280  | H                      | -2.2218570 | 2.4243610  | 0.0000600  |
| H                      | -2.3917590 | -2.2033560 | -0.0000750 | H                      | -0.0526880 | -2.3966710 | 0.0001820  |
| H                      | 3.6743700  | -0.8951900 | 0.0000260  |                        |            |            |            |
| H                      | 1.3885700  | 2.9802440  | 0.0000010  | <b>G</b>               |            |            |            |
| C                      | -3.0588830 | 0.5420970  | 0.0000020  | G = -580.38332773 a.u. |            |            |            |
| H                      | -3.1397940 | 1.1656660  | 0.8917760  | N                      | -1.9250280 | -0.4031850 | 0.0001630  |
| H                      | -3.1391450 | 1.1668070  | -0.8910250 | C                      | -2.3651070 | 0.8996220  | 0.0011330  |
| H                      | -3.8584600 | -0.1977040 | -0.0007730 | N                      | -1.3917180 | 1.7757880  | 0.0028490  |
| H                      | 2.4925040  | -2.1755970 | 0.0000500  | C                      | -0.2474370 | 1.0077430  | 0.0024910  |
|                        |            |            |            | C                      | 1.1333390  | 1.3847670  | 0.0010660  |
| <b>T</b>               |            |            |            | O                      | 1.6366190  | 2.5048710  | -0.0003740 |
| G = -492.16844063 a.u. |            |            |            | N                      | 1.9608590  | 0.2433580  | -0.0023890 |
| N                      | -1.1703410 | 0.6290820  | -0.0001240 | C                      | 1.5390640  | -1.0641420 | -0.0001440 |
| C                      | -1.2401950 | -0.7453040 | -0.0002360 | N                      | 2.5029510  | -2.0189210 | -0.0567940 |
| O                      | -2.3006660 | -1.3578420 | 0.0002590  | N                      | 0.2730160  | -1.4122730 | 0.0050500  |
| N                      | -0.0172640 | -1.3827160 | -0.0000520 | C                      | -0.5631840 | -0.3462360 | 0.0004280  |
| C                      | 1.2446940  | -0.7961790 | -0.0001310 | H                      | -3.4223220 | 1.1290880  | 0.0006250  |

|                         |            |            |            |   |            |            |            |
|-------------------------|------------|------------|------------|---|------------|------------|------------|
| H                       | 3.4424260  | -1.8028580 | 0.2436850  | C | 2.1219950  | 1.3991100  | -0.0043200 |
| H                       | 2.1898110  | -2.9615900 | 0.1269310  | N | 1.5195930  | 2.5917090  | -0.0084320 |
| H                       | 2.9551150  | 0.4431750  | -0.0274730 | N | 3.4708900  | 1.3901490  | -0.0072580 |
| C                       | -2.7294750 | -1.6149830 | -0.0012730 | C | 3.9831000  | 0.1723110  | -0.0039060 |
| H                       | -2.5076520 | -2.2056430 | -0.8914210 | N | 3.2532200  | -0.9795080 | 0.0043420  |
| H                       | -2.5131700 | -2.2044270 | 0.8910730  | C | 1.8432650  | -0.9202780 | 0.0070730  |
| H                       | -3.7809190 | -1.3307100 | -0.0047770 | O | 1.2100040  | -1.9799950 | 0.0133730  |
| <b>C</b>                |            |            |            | C | 4.1092480  | -2.0789110 | 0.0078320  |
| G = -433.11300410 a.u.  |            |            |            | C | 5.3633990  | -1.5751380 | 0.0011410  |
| N                       | -1.1119300 | 0.4360810  | 0.0000060  | N | 5.2806390  | -0.1845740 | -0.0081870 |
| C                       | -0.6219260 | -0.8833540 | -0.0000020 | C | 6.4019420  | 0.7454480  | -0.0051290 |
| O                       | -1.4389110 | -1.8102640 | -0.0000020 | N | -4.5890380 | -1.7745540 | -0.0062000 |
| N                       | 0.7244090  | -1.0756730 | -0.0000480 | C | -3.5985010 | 1.7855490  | 0.0029370  |
| C                       | 1.5478480  | -0.0345910 | -0.0000320 | C | -2.1529920 | 1.6668940  | 0.0057350  |
| N                       | 2.8697310  | -0.2852890 | 0.0000990  | O | -1.3785500 | 2.6316350  | 0.0087810  |
| C                       | 1.0832090  | 1.3202400  | 0.0000240  | N | -1.6270290 | 0.3818700  | 0.0047660  |
| C                       | -0.2624770 | 1.4935660  | 0.0000290  | C | -2.3353800 | -0.7820540 | 0.0009850  |
| H                       | 3.5473760  | 0.4600500  | -0.0005020 | N | -1.6403190 | -1.9125030 | 0.0005100  |
| H                       | 1.7619200  | 2.1618460  | 0.0000690  | C | -3.7459860 | -0.6523330 | -0.0020660 |
| H                       | -0.7219750 | 2.4760230  | 0.0000590  | C | -4.3344710 | 0.6442420  | -0.0009050 |
| H                       | 3.1935630  | -1.2405910 | -0.0004170 | C | -4.1831760 | 3.1658000  | 0.0039450  |
| C                       | -2.5606440 | 0.6206090  | 0.0000310  | O | -4.0938330 | -2.9144960 | -0.0082030 |
| H                       | -2.9930010 | 0.1557690  | -0.8872520 | O | -5.8114240 | -1.6058190 | -0.0078520 |
| H                       | -2.9929550 | 0.1559660  | 0.8874410  | H | 2.0877140  | 3.4244090  | -0.0117330 |
| H                       | -2.7751790 | 1.6884070  | -0.0000820 | H | 3.7352760  | -3.0887530 | 0.0134230  |
| <b>P:Z pair</b>         |            |            |            | H | 6.3190710  | -2.0752940 | 0.0001500  |
| G = -1201.57225383 a.u. |            |            |            | H | 6.0027840  | 1.7512990  | -0.1248180 |
| N                       | 1.3117210  | 0.3109620  | 0.0025580  | H | -0.6137390 | -1.9061610 | 0.0049870  |
|                         |            |            |            | H | -5.4179850 | 0.6939640  | -0.0033660 |
|                         |            |            |            | H | 6.9411220  | 0.6720670  | 0.9402830  |

H 7.0682740 0.5115800 -0.8356230  
H -5.2736120 3.1177440 0.0016480  
H -3.8581860 3.7265110 0.8857530  
H -3.8546140 3.7292480 -0.8748020  
H -2.1514070 -2.7836420 -0.0021390  
H 0.5018000 2.6532520 -0.0027260  
H -0.5884760 0.3344830 0.0055450

**G:C pair**

G = -1013.52713785 a.u.

N -4.3550930 -0.6911420 -0.0186640  
C -2.9637380 -0.7909280 -0.0764520  
O -2.4571520 -1.9218710 -0.1630410  
N -2.2201100 0.3420740 -0.0377030  
C -2.8087930 1.5386760 0.0589210  
N -2.0232640 2.6189320 0.0902640  
C -4.2337120 1.6703350 0.1266730  
C -4.9556490 0.5239490 0.0826660  
N 4.6368770 -0.3354010 0.0196690  
C 4.9551910 1.0022970 -0.0433680  
N 3.9066310 1.7839890 -0.0869430  
C 2.8359400 0.9135700 -0.0504000  
C 1.4294070 1.1516710 -0.0684350  
O 0.8376860 2.2397420 -0.1216910  
N 0.7011490 -0.0378320 -0.0172850  
C 1.2398510 -1.3014680 0.0494060  
N 0.3636510 -2.3189810 0.1155700  
N 2.5402370 -1.5383470 0.0675900  
C 3.2744760 -0.4059930 0.0167250  
H -2.4270850 3.5400200 0.1591070

H -4.7142410 2.6357280 0.2069600  
H -6.0390020 0.5169760 0.1248640  
H 5.9872660 1.3270200 -0.0541180  
H -0.6434830 -2.1764060 -0.0004250  
H 0.7412070 -3.2534170 0.0903560  
H -0.3307610 0.0689380 -0.0289270  
H -1.0079890 2.5164060 0.0206450

C -5.1306010 -1.9298580 -0.0621210

H -4.9106380 -2.4698400 -0.9837950

H -4.8689950 -2.5592550 0.7894990

H -6.1886390 -1.6759440 -0.0245930

C 5.5506980 -1.4638800 0.0890260

H 5.4263050 -1.9881370 1.0381980

H 5.3527950 -2.1509870 -0.7350480

H 6.5700230 -1.0873290 0.0117880

**A:T pair**

G = -997.48108677 a.u.

N 3.9437170 -1.2852150 0.0083180  
C 2.5652080 -1.3166710 -0.0041460  
O 1.9288950 -2.3665430 -0.0084570  
N 1.9534440 -0.0868550 -0.0115470  
C 2.5734350 1.1455700 -0.0058390  
O 1.8956490 2.1801800 -0.0120180  
C 4.0266240 1.1194020 0.0075570  
C 4.7730610 2.4189440 0.0136540  
C 4.6281810 -0.0929430 0.0139110  
N -4.8851890 -0.3994220 0.0144280  
C -5.1678620 0.9416530 0.0222540  
N -4.1023610 1.7083340 0.0133610



|                 |                       |            |            |   |            |            |            |
|-----------------|-----------------------|------------|------------|---|------------|------------|------------|
| C               | -3.0546920            | 0.8130000  | -0.0020180 | N | -2.3605680 | -1.3908450 | 0.0024280  |
| C               | -1.6530380            | 0.9828550  | -0.0136870 | C | -3.3870980 | -0.5586510 | 0.0110460  |
| N               | -1.0583360            | 2.1824760  | -0.0146710 | N | -3.2903030 | 0.8000650  | -0.0232860 |
| N               | -0.8927440            | -0.1313080 | -0.0248260 | C | -2.0149470 | 1.4252740  | -0.0746450 |
| C               | -1.4801100            | -1.3413060 | -0.0238150 | O | -1.9603540 | 2.6515510  | -0.1018260 |
| N               | -2.7764200            | -1.6202260 | -0.0131860 | C | -4.5634490 | 1.3627130  | 0.0041100  |
| C               | -3.5207150            | -0.4999180 | -0.0020130 | C | -5.4310990 | 0.3273090  | 0.0537860  |
| H               | 5.8507130             | 2.2443740  | 0.0210360  | N | -4.7002510 | -0.8583490 | 0.0548750  |
| H               | 4.5097440             | 3.0135310  | 0.8933980  | C | -5.2466060 | -2.2062720 | 0.1243780  |
| H               | 4.5218610             | 3.0144970  | -0.8689650 | H | -0.1744680 | -2.5225480 | -0.0201940 |
| H               | 5.7090510             | -0.1884610 | 0.0241620  | H | -4.7115590 | 2.4291440  | -0.0170270 |
| H               | -6.1916820            | 1.2920690  | 0.0355760  | H | -6.5089380 | 0.3161720  | 0.0862130  |
| H               | -0.0405820            | 2.2511300  | -0.0160570 | H | -4.4303350 | -2.9088670 | -0.0360750 |
| H               | -0.7899830            | -2.1823180 | -0.0324410 | H | -5.6923350 | -2.3773570 | 1.1055470  |
| C               | -5.8275010            | -1.5074000 | 0.0145740  | H | -5.9993410 | -2.3328560 | -0.6540870 |
| H               | -5.7420150            | -2.0702210 | -0.9163600 | H | 0.8593920  | -1.0877340 | -0.0791200 |
| H               | -5.6202520            | -2.1648830 | 0.8599620  | N | 4.9114690  | -0.4211690 | 0.0367880  |
| H               | -6.8348580            | -1.1031180 | 0.1058450  | C | 3.6169450  | -0.9576600 | -0.0581360 |
| C               | 4.6411550             | -2.5707480 | 0.0162540  | O | 3.4868480  | -2.1848160 | -0.1308930 |
| H               | 4.3647520             | -3.1378790 | 0.9062600  | N | 2.5606510  | -0.1027550 | -0.0664400 |
| H               | 4.3714430             | -3.1444360 | -0.8715180 | C | 2.7465490  | 1.2148860  | 0.0198030  |
| H               | 5.7126920             | -2.3805150 | 0.0195460  | N | 1.6605300  | 1.9974200  | 0.0094570  |
| H               | -1.6218930            | 3.0185110  | -0.0004260 | C | 4.0575590  | 1.7876970  | 0.1179390  |
| H               | 0.9074080             | -0.1004790 | -0.0194700 | C | 5.1007070  | 0.9212910  | 0.1217630  |
| <b>P:C pair</b> |                       |            |            | H | 1.7517640  | 2.9986060  | 0.0815900  |
| G               | = -1013.50725843 a.u. |            |            | H | 4.2119380  | 2.8557540  | 0.1864820  |
| N               | -0.9685990            | 0.5813800  | -0.0883670 | H | 6.1307140  | 1.2536240  | 0.1915420  |
| C               | -1.1672500            | -0.7551600 | -0.0483860 | H | 0.7298420  | 1.5696820  | -0.0417340 |
| N               | -0.0693830            | -1.5209840 | -0.0615860 | C | 6.0344490  | -1.3549630 | 0.0419970  |
|                 |                       |            |            | H | 5.9516550  | -2.0305260 | 0.8947930  |

H 6.0305020 -1.9441650 -0.8760530  
H 6.9598240 -0.7849260 0.1108490

**P:T pair**

G = -1072.56218909 a.u.

N -0.8891660 -0.2054170 0.4893510  
C -1.4578750 -1.2603150 -0.1362020  
N -0.6462240 -2.2890580 -0.4270270  
N -2.7494650 -1.3804970 -0.5089090  
C -3.4775100 -0.3240100 -0.1880130  
N -3.0071540 0.7764080 0.4613760  
C -1.6377040 0.8617220 0.8331970  
O -1.2515100 1.8654480 1.4210930  
C -4.0402630 1.6913520 0.6433840  
C -5.1410220 1.1289640 0.0959580  
N -4.7885830 -0.1173250 -0.4163400  
C -5.6776530 -1.0530840 -1.0908000  
H -1.0483090 -3.1202370 -0.8317270  
H -3.8799200 2.6352280 1.1364800  
H -6.1518940 1.4967020 0.0190390  
H -5.1005430 -1.9410010 -1.3437420  
H -6.4980830 -1.3234550 -0.4250940  
H -6.0699220 -0.5972020 -2.0008080  
H 0.2959830 -2.3118790 -0.0424160  
N 4.0291270 -1.0496340 0.1906450  
C 2.6654910 -1.0673370 0.3457680  
O 2.0617320 -2.0853550 0.6934500  
N 2.0197790 0.1144370 0.0866700  
C 2.6047510 1.2985470 -0.3460160  
O 1.9122910 2.2870750 -0.5737330

C 4.0541650 1.2545080 -0.4955060  
C 4.7625750 2.4960390 -0.9445780  
C 4.6831780 0.0911720 -0.2194920  
H 5.8366520 2.3193000 -1.0273540  
H 4.5959800 3.3139420 -0.2372350  
H 4.3859950 2.8257610 -1.9172730  
H 5.7597460 -0.0088610 -0.3108320  
C 4.7500870 -2.2950570 0.4559630  
H 4.5699780 -2.6149820 1.4830170  
H 4.4093850 -3.0742960 -0.2274760  
H 5.8128840 -2.1142070 0.3073850  
H 0.9944470 0.1004300 0.2392270

**A:Z pair**

G = -1126.47709443 a.u.

N 4.9062770 0.0951760 -0.8333670  
C 5.1720880 -1.1851310 -0.4211840  
N 4.2361440 -1.7086490 0.3349240  
C 3.2921120 -0.7090750 0.4232320  
C 2.0615580 -0.6079280 1.0898720  
N 1.5044300 -1.6361540 1.7991640  
N 1.3656260 0.5307840 0.9733430  
C 1.8681100 1.5444150 0.2408320  
N 3.0181650 1.5736430 -0.4169990  
C 3.6924710 0.4208680 -0.2968060  
H 6.0871730 -1.6819110 -0.7168860  
H 0.9238080 -1.3630420 2.5843130  
H 1.2374480 2.4287590 0.1894010  
C 5.7357820 0.9522880 -1.6674230  
H 5.1830130 1.2413810 -2.5621700

|   |            |            |            |   |            |            |            |
|---|------------|------------|------------|---|------------|------------|------------|
| H | 6.0239180  | 1.8440740  | -1.1091600 | C | 2.7157920  | -0.9830170 | -0.0346410 |
| H | 6.6270900  | 0.3952110  | -1.9526050 | N | 2.3316080  | -2.2586810 | -0.0579520 |
| H | 2.1137550  | -2.4211740 | 1.9936660  | C | 4.0316100  | -0.4786490 | 0.0245840  |
| N | -4.1035370 | -1.7952150 | -0.6793480 | C | 4.2413860  | 0.9289560  | 0.0389110  |
| C | -3.4249160 | 1.7828710  | -0.0346940 | C | 3.4053210  | 3.3163030  | 0.0152640  |
| C | -2.0481020 | 1.7240240  | 0.4308210  | O | 4.9620610  | -2.5658740 | 0.0586370  |
| O | -1.3666680 | 2.6981070  | 0.7494020  | O | 6.2743230  | -0.8522850 | 0.1306620  |
| N | -1.4777450 | 0.4537430  | 0.5142850  | H | 1.3457320  | -2.4867020 | -0.0944040 |
| C | -2.0564970 | -0.7238620 | 0.1667790  | H | 5.2694550  | 1.2731160  | 0.0815710  |
| N | -1.3195370 | -1.8272580 | 0.2837670  | H | 4.4660260  | 3.5700990  | 0.0538610  |
| C | -3.3926490 | -0.6491080 | -0.2925220 | H | 2.9679600  | 3.7695490  | -0.8795960 |
| C | -4.0379070 | 0.6207110  | -0.3755350 | H | 2.9057410  | 3.7626480  | 0.8804840  |
| C | -4.0714640 | 3.1326180  | -0.1144740 | H | 3.0293900  | -2.9872460 | -0.0297580 |
| O | -3.5568720 | -2.9100100 | -0.6074350 | H | 0.7497850  | -0.4260440 | -0.1118960 |
| O | -5.2623440 | -1.6737930 | -1.0843800 | N | -5.3060910 | -0.7765750 | 0.0619620  |
| H | -0.3734030 | -1.7994430 | 0.6528830  | C | -4.9584790 | -2.1077360 | 0.0191270  |
| H | -5.0627330 | 0.6283800  | -0.7308670 | N | -3.6669720 | -2.3074120 | -0.0451680 |
| H | -5.0936370 | 3.0461450  | -0.4873870 | C | -3.1313250 | -1.0363790 | -0.0440750 |
| H | -4.0953200 | 3.6115720  | 0.8694130  | C | -1.7839870 | -0.5840370 | -0.0919510 |
| H | -3.5083860 | 3.7940220  | -0.7801520 | O | -0.7414220 | -1.2642140 | -0.1459090 |
| H | -1.7402960 | -2.7131530 | 0.0417370  | N | -1.7014430 | 0.8052310  | -0.0709870 |
| H | -0.4876260 | 0.4561230  | 0.8233410  | C | -2.7669110 | 1.6660170  | -0.0015860 |

**G:Z pair**

G = -1201.57604085 a.u.

|   |           |            |            |   |            |            |            |
|---|-----------|------------|------------|---|------------|------------|------------|
| N | 5.1452230 | -1.3389800 | 0.0734640  | N | -4.0206990 | 1.2708270  | 0.0512460  |
| C | 3.2211030 | 1.8287670  | 0.0018200  | C | -4.1392170 | -0.0752300 | 0.0234000  |
| C | 1.8681940 | 1.3173120  | -0.0540610 | H | -5.7171510 | -2.8792050 | 0.0384710  |
| O | 0.8472720 | 2.0249480  | -0.0867330 | H | -1.5177700 | 3.2864650  | 0.1617230  |
| N | 1.7223920 | -0.0581500 | -0.0733250 | H | -3.2055020 | 3.6279330  | 0.2012240  |
|   |           |            |            | H | -0.7541710 | 1.2169410  | -0.1032820 |
|   |           |            |            | C | -6.6425440 | -0.2093540 | 0.1513700  |

H -6.7731690 0.2910670 1.1123460  
H -6.7916840 0.5074160 -0.6571390  
H -7.3662960 -1.0180570 0.0594490
